# Supplementary material
Source: ML conference proceedings conference paper supplement (https://openaccess.thecvf.com/content/CVPR_2020/html/Wang_Robust_Object_Detection_CVPR_2020_paper.html)
Supplement: Supplementary file 2 [file Wang_Robust_Object_Detection_CVPR_2020_supplemental.pdf]

# Robust Object Detection under Occlusion with Context-Aware CompositionalNets

## Supplementary Material

### 1. Additional Detection Result Visualization

For all visualizations, we use the same notation. Green boxes: Proposals of CA-CompositionalNet via BB Voting. Blue Boxes: Ground truth. Yellow Boxes: Proposals of CA-CompositionalNet via RPN. Red Boxes: Proposals of Faster R-CNN.

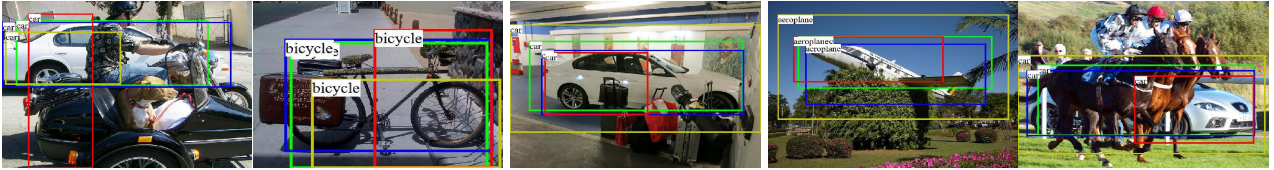

Figure 1: Detection results on the heavy occlusion OccludedCOCO Dataset.

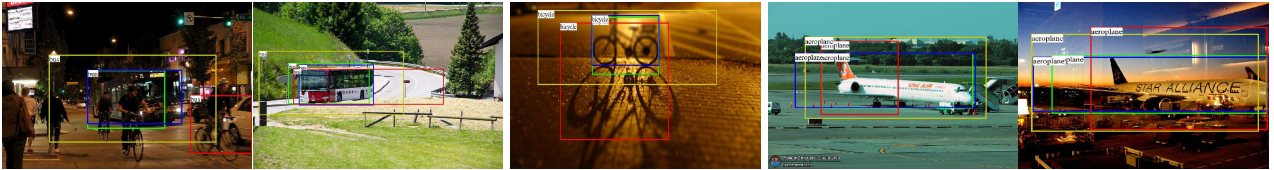

Figure 2: Detection results on the light occlusion OccludedCOCO Dataset.

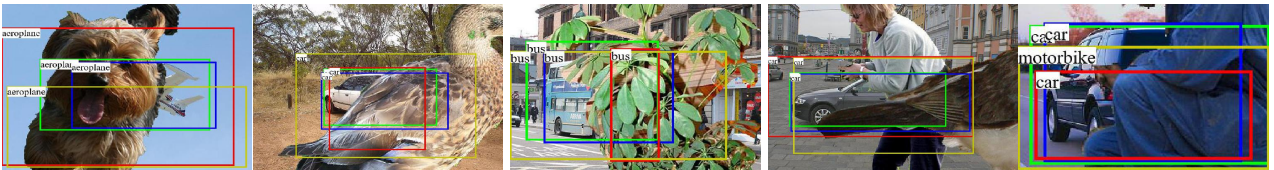

Figure 3: Detection results on the OccludedVehiclesDetection Dataset with foreground level 3 background level 3 occlusion.

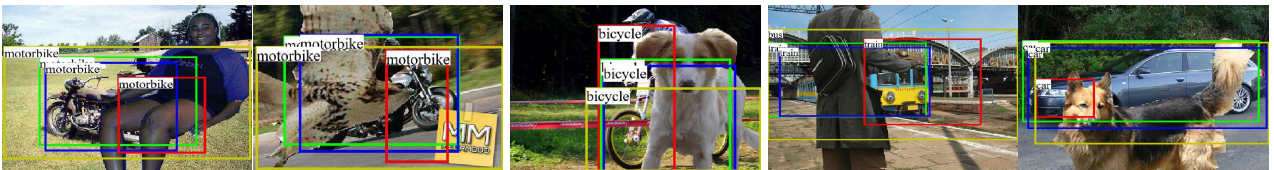

Figure 4: Detection results on the OccludedVehiclesDetection Dataset with foreground level 2 background level 2 occlusion.
